# Supplementary material for: Arbuscular Mycorrhiza Enhances Biomass Production and Salt Tolerance of Sweet Sorghum
Source: PubMed Central journal article supplement (PMC6780689; doi:10.3390/microorganisms7090289), 2019-08-23
Supplement: microorganisms-07-00289-s001.pdf [file microorganisms-07-00289-s001.pdf]

### Supplementary information

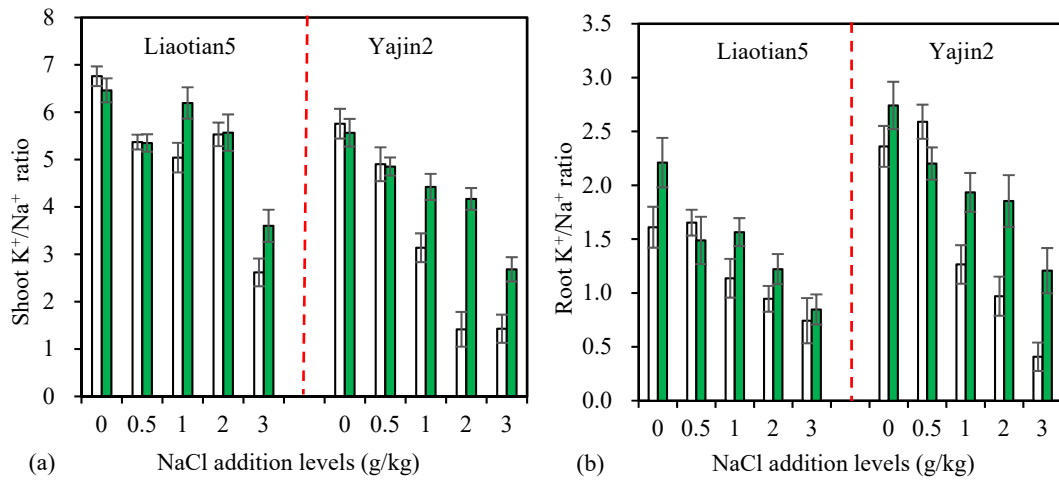

**Figure S1.**  $K^+/Na^+$  ratio (mean values) in shoots (a) and roots (b) of sweet sorghum under different NaCl addition levels. The white and green columns represent non-AM inoculation and inoculation with *Acaulospora mellea* ZZ, respectively.

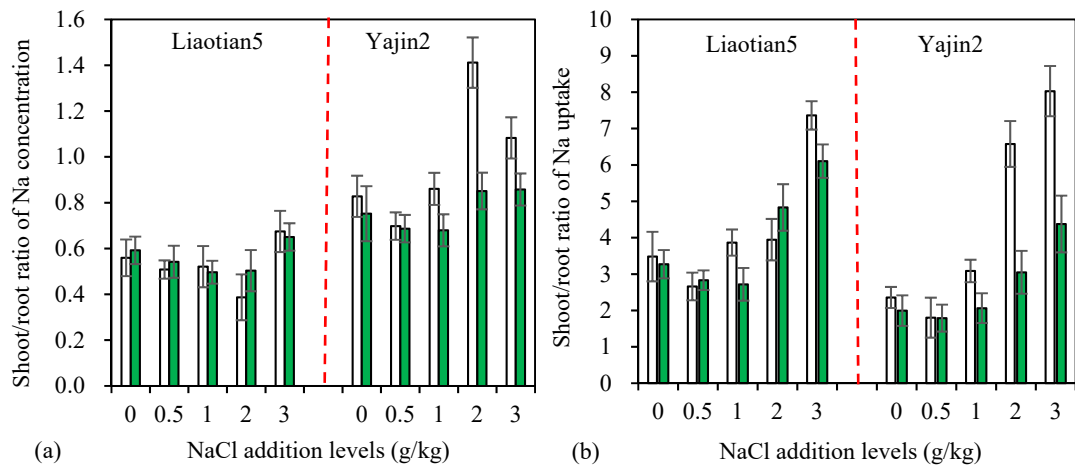

**Figure S2.** Shoot/root ratio of Na concentration (a) and uptake (b) of sweet sorghum under different NaCl addition levels. The white and green columns represent non-AM inoculation and inoculation with *Acaulospora mellea* ZZ, respectively.

**Table S1.** Concentrations of K and Na in shoots and roots of sweet sorghum under different NaCl addition levels

| NaCl<br>(g/kg) | Inoculation | Liaotian5              |             |                         |             | Yajin2                 |             |                         |             |
|----------------|-------------|------------------------|-------------|-------------------------|-------------|------------------------|-------------|-------------------------|-------------|
|                |             | K concentration (g/kg) |             | Na concentration (g/kg) |             | K concentration (g/kg) |             | Na concentration (g/kg) |             |
|                |             | Shoots                 | Roots       | Shoots                  | Roots       | Shoots                 | Roots       | Shoots                  | Roots       |
| 0              | -M          | 19.92±0.76bc           | 8.48±0.42c  | 2.95±0.21f              | 5.27±0.18g  | 23.35±0.29bc           | 11.57±0.48f | 4.05±0.31f              | 4.90±0.15c  |
|                | +M          | 21.24±0.54a            | 12.27±0.52a | 3.29±0.19e              | 5.55±0.22f  | 25.04±0.61a            | 16.40±0.42b | 4.50±0.22f              | 5.98±0.19f  |
| 0.5            | -M          | 18.42±0.56d            | 7.84±0.21d  | 3.43±0.16de             | 6.75±0.11e  | 23.92±0.58b            | 18.11±0.33a | 4.88±0.36e              | 6.99±0.16e  |
|                | +M          | 21.50±0.76a            | 11.03±0.39b | 4.02±0.19c              | 7.41±0.23d  | 23.86±0.60b            | 15.76±0.47c | 4.92±0.19e              | 7.16±0.14d  |
| 1              | -M          | 18.11±0.41d            | 7.84±0.21d  | 3.59±0.31de             | 6.90±0.16e  | 18.59±0.31e            | 8.71±0.49g  | 5.92±0.30d              | 6.88±0.18e  |
|                | +M          | 21.31±0.49a            | 10.84±0.30b | 3.44±0.33de             | 6.93±0.11e  | 22.66±0.65c            | 14.58±0.38d | 5.12±0.18e              | 7.54±0.17e  |
| 2              | -M          | 19.61±0.51c            | 8.66±0.30c  | 3.54±0.25de             | 9.16±0.11b  | 16.57±0.39g            | 8.04±0.19h  | 11.70±0.37b             | 8.29±0.18b  |
|                | +M          | 20.53±0.33ab           | 8.95±0.44c  | 3.69±0.38cd             | 7.32±0.24d  | 23.93±0.66b            | 12.50±0.27  | 5.74±0.13d              | 6.74±0.23d  |
| 3              | -M          | 17.91±0.49d            | 7.54±0.13de | 6.84±0.29a              | 10.14±0.32a | 17.90±0.33f            | 4.71±0.28i  | 12.52±0.70a             | 11.56±0.23a |
|                | +M          | 19.54±0.43c            | 7.06±0.34e  | 5.42±0.34b              | 8.34±0.09c  | 21.49±0.47d            | 11.28±0.23f | 8.01±0.16c              | 9.34±0.21c  |

Note: -M and +M represent non-AM inoculation and inoculation with *Acaulospora mellea* ZZ, respectively. Different letters following the mean values ( $\pm$  SD) in the same column indicate significant differences among different treatments of the same cultivar using a one-way ANOVA followed by the Tukey's multiple range test ( $p < 0.05$ ).
